# Supplementary material for: Enhanced electrical and thermal properties of semi-conductive PANI-CNCs with surface modified CNCs
Source: Royal Society of Chemistry journal article supplement (doi:10.1039/d0ra10663a), 2021-01-01
Supplement: d0ra10663a1.pdf [file d0ra10663a1.pdf]

## Supporting Information

### Enhanced electrical and thermal properties of semi-conductive PANI-CNCs with surface modified CNCs

Po-Yun Chen,<sup>a,+</sup> Chieh Hsu,<sup>a,+</sup> Manikandan Venkatesan,<sup>a</sup> Yen-Lin Tseng,<sup>a</sup> Chia-Jung

Cho,<sup>a,\*</sup> Su-Ting Han,<sup>b</sup> Ye Zhou,<sup>c</sup> Wei-Hung Chiang,<sup>d</sup> and Chi-Ching Kuo,<sup>a,\*</sup>

<sup>a</sup> Institute of Organic and Polymeric Materials, Research and Development Center of Smart Textile  
Technology, National Taipei University of Technology, Taipei 10608, Taiwan

\*Author to whom all correspondence should be addressed

Tel: 886-2-27712171\*2407 Fax: 886-2-27317174

Correspondence to: \*Prof. C.-C. Kuo: [kuocc@mail.ntut.edu.tw](mailto:kuocc@mail.ntut.edu.tw)

\*Dr. C.-J. Cho: [ppaul28865@mail.ntut.edu.tw](mailto:ppaul28865@mail.ntut.edu.tw)

**Table S1. Thermal properties and conductivity of MCC, S-CNC, C-CNC, SCNC-PANI, CCNC-PANI, and DBSA-SCNC-PANI nanocomposites.**

| Sample           | C (S/cm)              | T <sub>0</sub> (°C) | T <sub>max</sub> (°C) | T <sub>5%</sub> (°C) | T <sub>15%</sub> (°C) | Residual mass (%) |
|------------------|-----------------------|---------------------|-----------------------|----------------------|-----------------------|-------------------|
| MCC              | N/A                   | 320                 | 340.1                 | 285.0                | 321.9                 | 4.7               |
| S-CNC            | $8.26 \times 10^{-6}$ | 237                 | 294.8                 | 99.2                 | 249.0                 | 21.3              |
| C-CNC            | $1.27 \times 10^{-6}$ | 211                 | 304.5                 | 69.0                 | 222.9                 | 20.5              |
| SP <sub>10</sub> | $1.55 \times 10^{-4}$ | 145.0               | 199.6                 | 105.3                | 164.9                 | 34.4              |
| SP <sub>20</sub> | $9.60 \times 10^{-4}$ | 167.5               | 188.7                 | 68.1                 | 174.3                 | 37.3              |
| SP <sub>30</sub> | $1.06 \times 10^{-2}$ | 156.8               | 187.6                 | 63.4                 | 165.2                 | 40.0              |
| CP <sub>10</sub> | $8.60 \times 10^{-6}$ | 158.4               | 192.6                 | 64.8                 | 164.1                 | 33.4              |
| CP <sub>20</sub> | $1.19 \times 10^{-4}$ | 225.6               | 277.9                 | 54.3                 | 228.5                 | 38.2              |
| CP <sub>30</sub> | $3.00 \times 10^{-3}$ | 189.9               | 209.4                 | 75.2                 | 202.0                 | 36.7              |
| DSP <sub>1</sub> | $5.4 \times 10^{-4}$  | 177.3               | 206.7                 | 121.4                | 189.7                 | 35.06             |
| DSP <sub>2</sub> | $2.5 \times 10^{-2}$  | 179.3               | 199.5                 | 153.2                | 193                   | 34.7              |
| DSP <sub>3</sub> | $1.25 \times 10^{-1}$ | 182.4               | 182.8                 | 84.8                 | 189.5                 | 32.1              |
| DSP <sub>4</sub> | $2.5 \times 10^{-1}$  | 192.0               | 209.6                 | 148.7                | 206.2                 | 40.0              |
| DSP <sub>5</sub> | $1.9 \times 10^{-2}$  | 168.8               | 211                   | 105.6                | 180.1                 | 31.64             |
| DSP <sub>6</sub> | $2.9 \times 10^{-2}$  | 199.9               | 210                   | 102.5                | 205.6                 | 31.49             |
| DSP <sub>7</sub> | $1.17 \times 10^{-2}$ | 156.2               | 195                   | 78.1                 | 166.1                 | 33.9              |

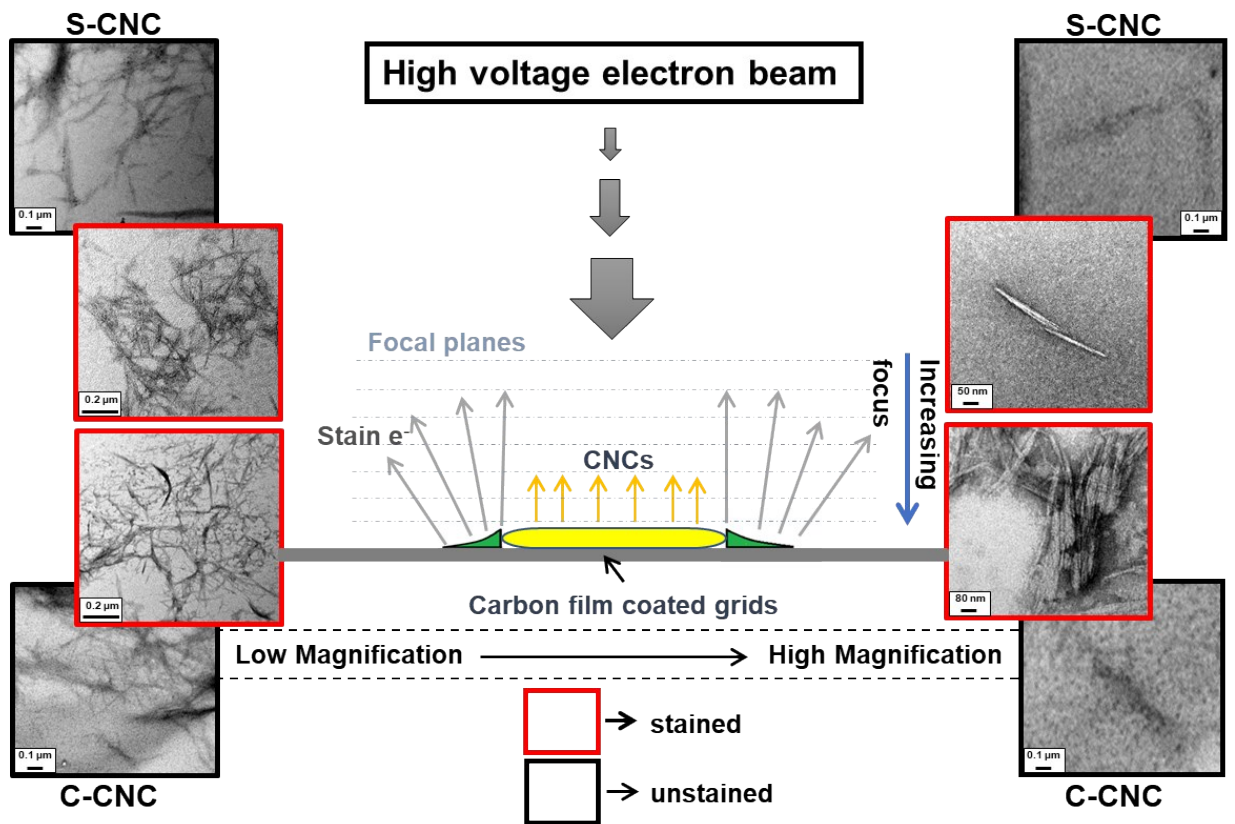

**Figure S1.** Comparison between negative stain electron microscopy (Red) by using Uranyl acetate (UA) combined with carbon grid exhibited higher resolution under dark background and transmission electron microscopy (Black)

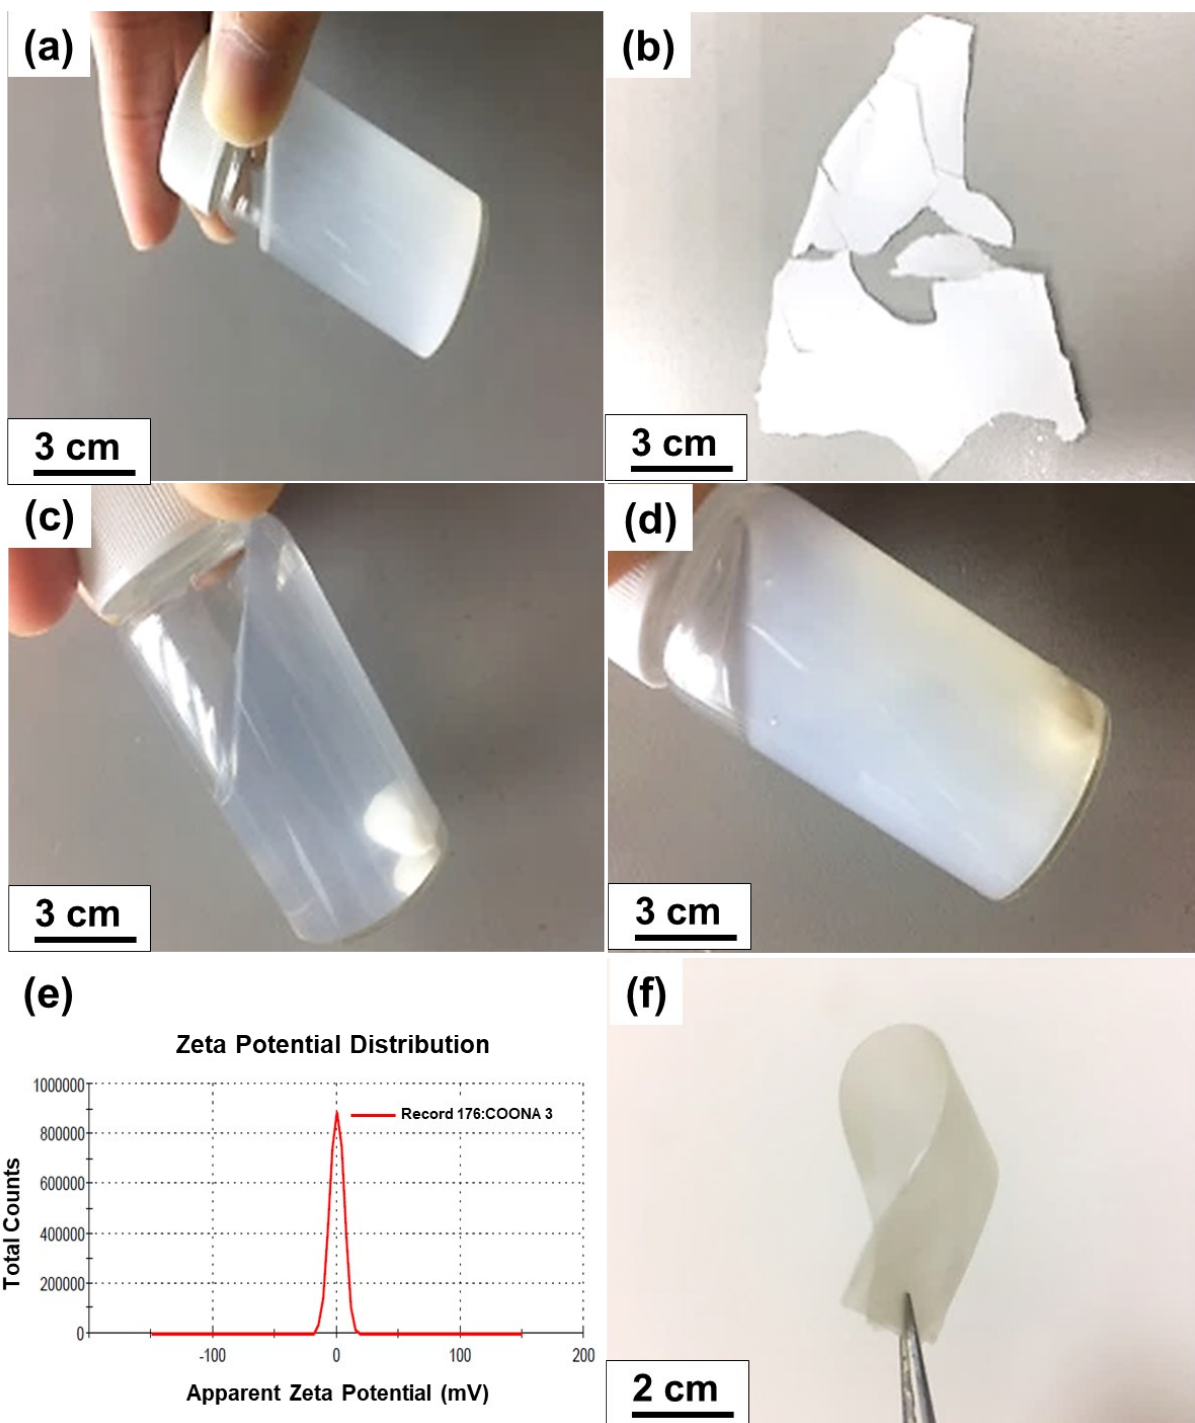

**Figure S2.** Visual aspect of (a) C-CNC aqueous, (b) C-CNC films before modification, (c) 2wt% C-CNC-COONa<sup>+</sup> aqueous, (d) 5wt% C-CNC-COONa<sup>+</sup> aqueous, (e) Zeta potential distribution of 5wt% C-CNC-COONa<sup>+</sup>, (f) C-CNC films after modification.

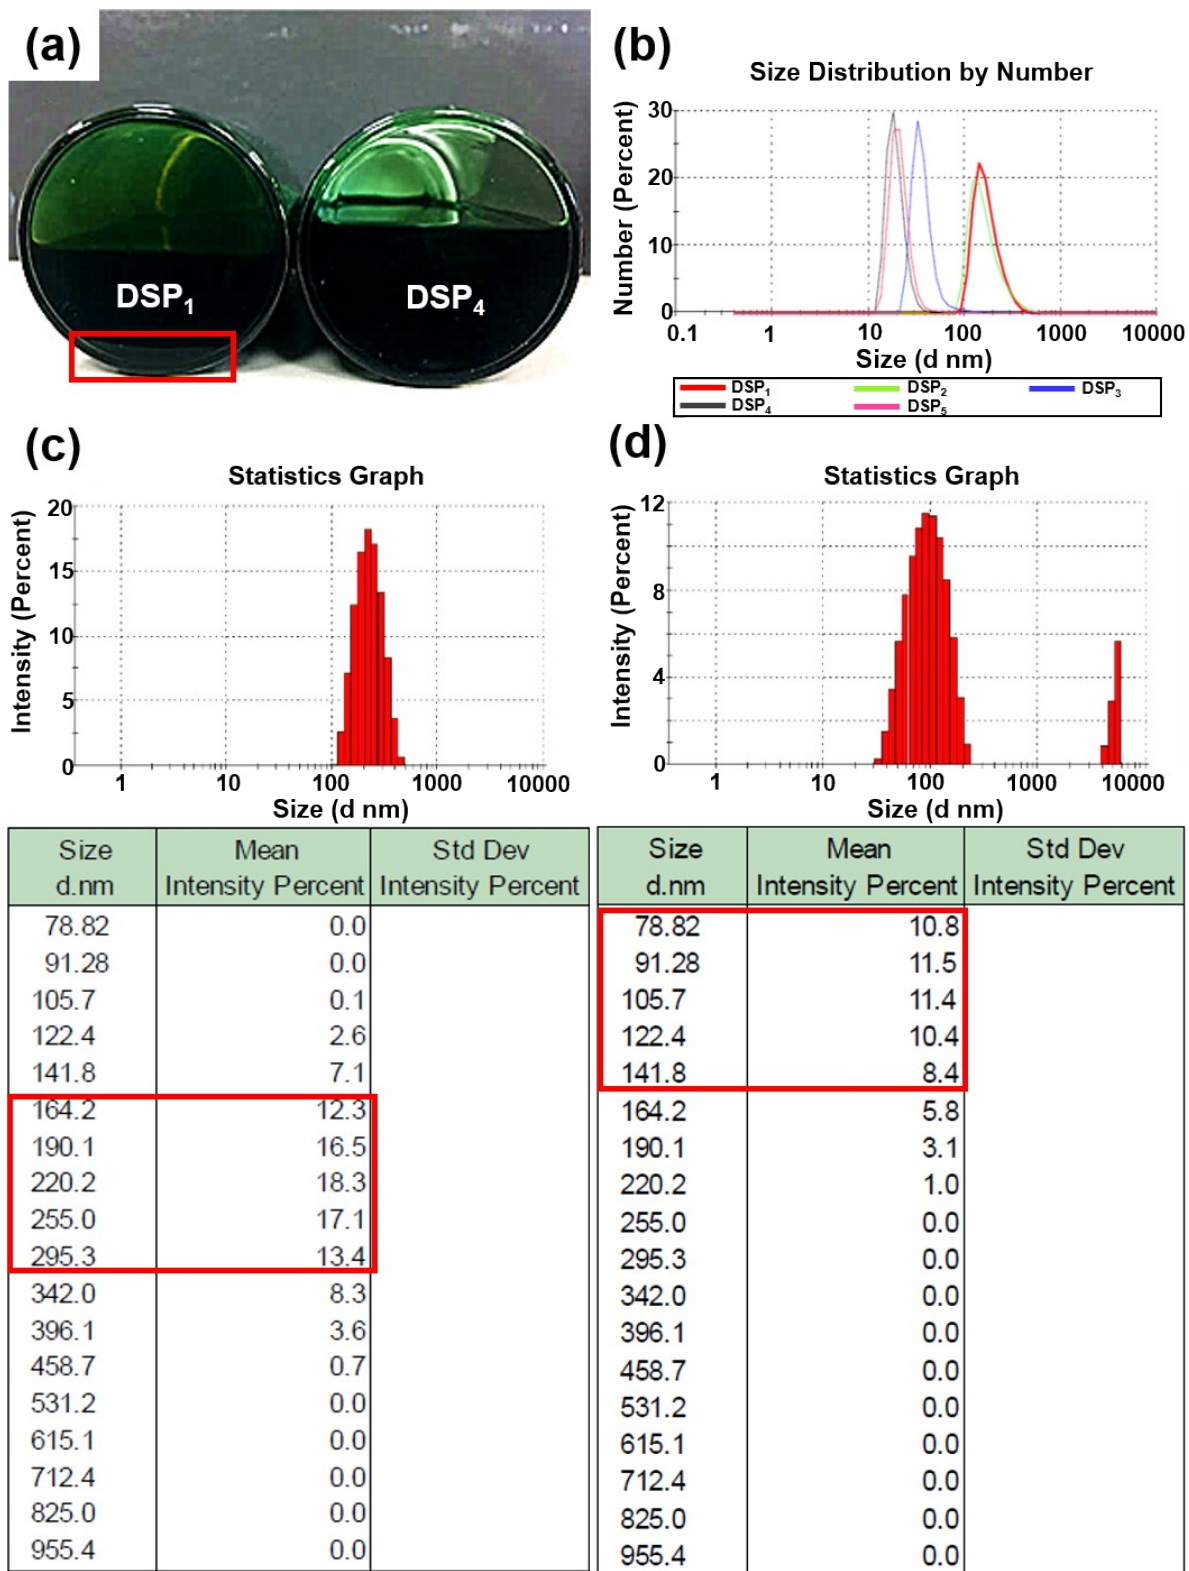

**Figure S3.** Settling test of DSP<sub>1</sub> and DSP<sub>4</sub> suspension after emulsion polymerization, (b) Particle size distribution of DSP<sub>1</sub>, DSP<sub>2</sub>, DSP<sub>3</sub>, DSP<sub>4</sub>, and DSP<sub>5</sub>, (c) Particle size distribution of DSP<sub>1</sub> and DSP<sub>4</sub>.

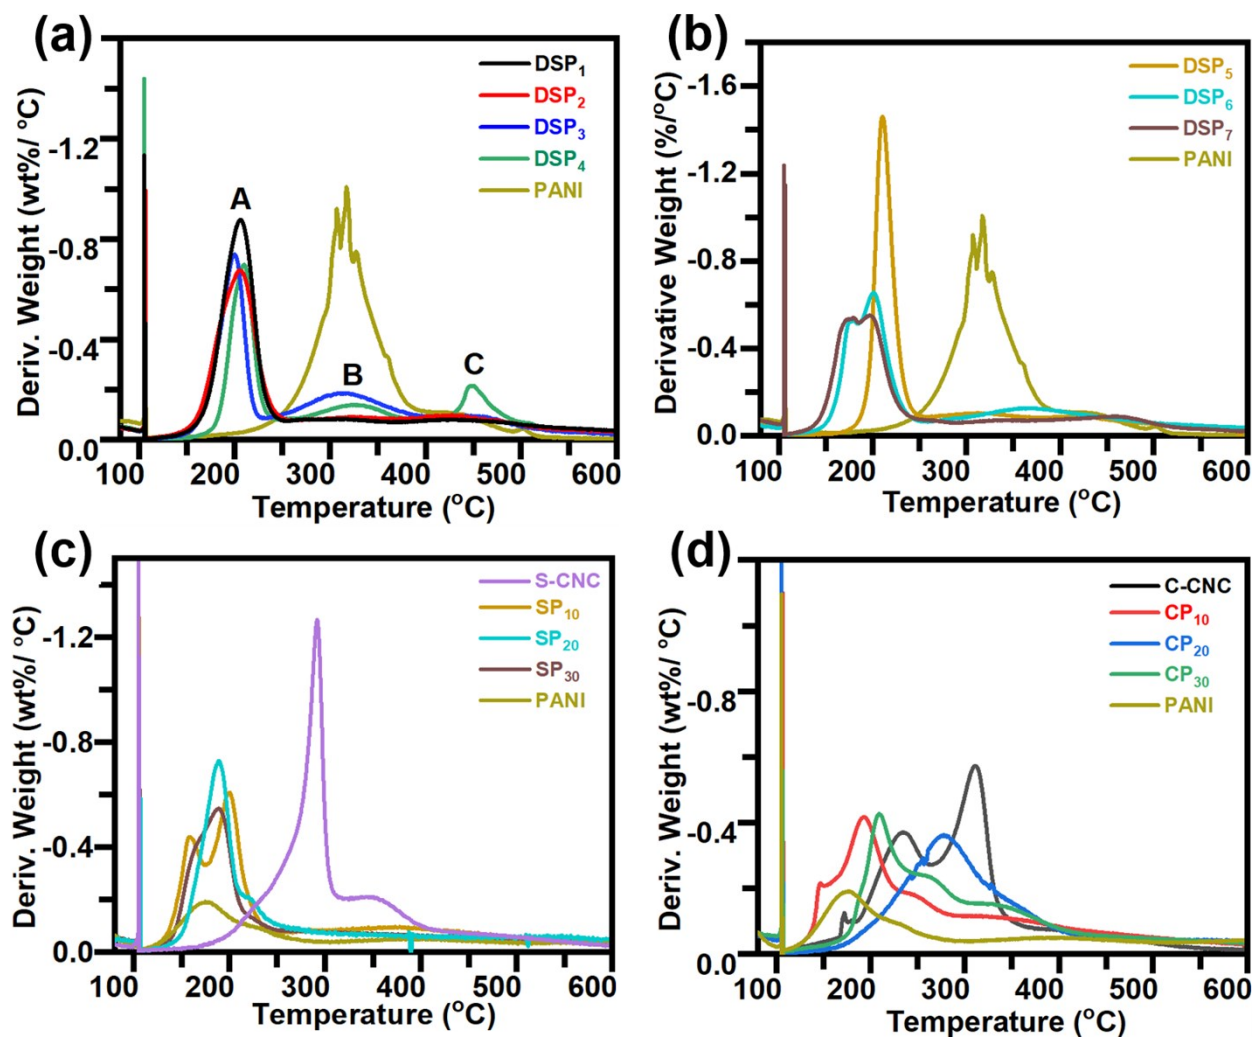

**Figure S4.** DTG curves of (a) DSP<sub>1</sub>, DSP<sub>2</sub>, DSP<sub>3</sub>, DSP<sub>4</sub>, and PANI, (b) DSP<sub>5</sub>, DSP<sub>6</sub>, DSP<sub>7</sub>, and PANI, (c) S-CNC, SP<sub>10</sub>, SP<sub>20</sub>, SP<sub>30</sub>, and PANI, (d) C-CNC, CP<sub>10</sub>, CP<sub>20</sub>, CP<sub>30</sub>, and PANI.



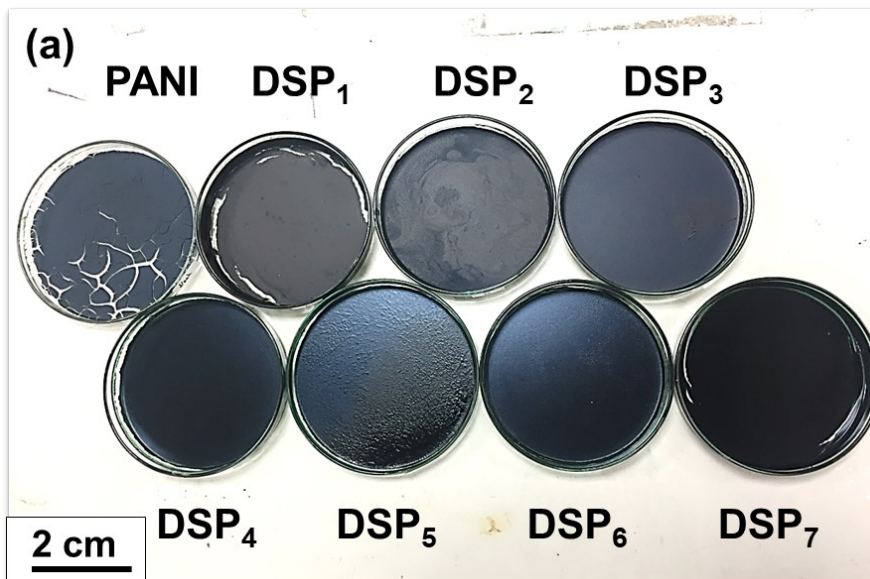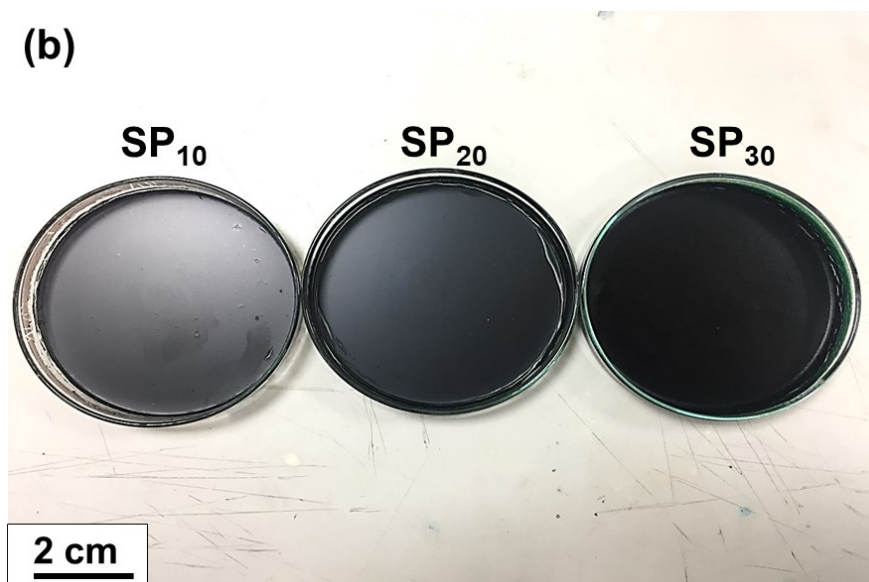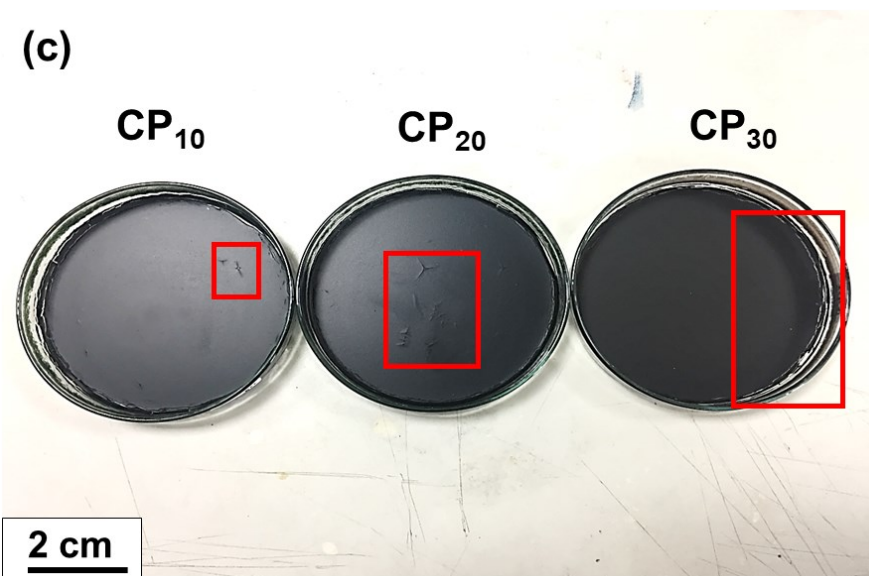

**Figure S5.** Photographs of (a) PANI, DSP<sub>1</sub>, DSP<sub>2</sub>, DSP<sub>3</sub>, DSP<sub>4</sub>, DSP<sub>5</sub>, DSP<sub>6</sub>, DSP<sub>7</sub> films casting on the petri deck, (b) SP<sub>10</sub>, SP<sub>20</sub>, SP<sub>30</sub> films casting on the petri deck, (c) CP<sub>10</sub>, CP<sub>20</sub>, CP<sub>30</sub> films casting on the petri deck.

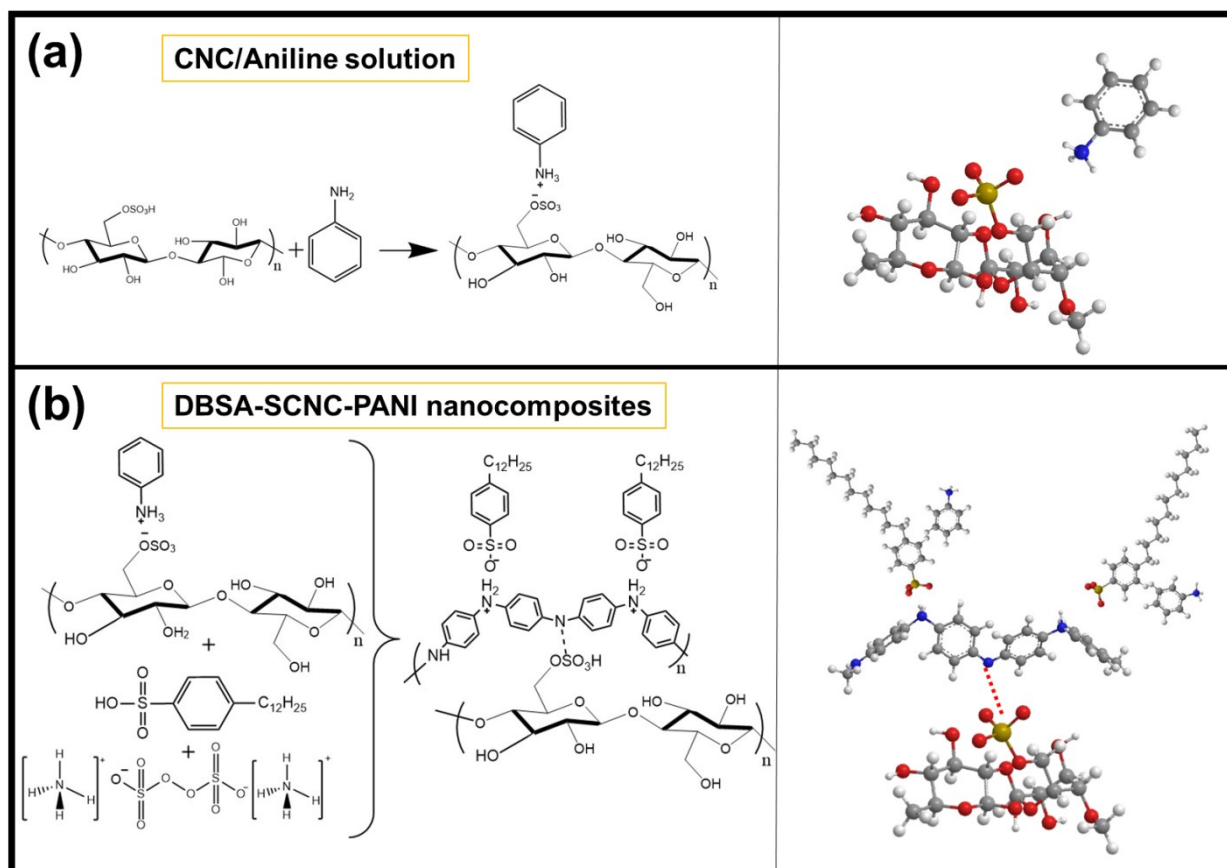

**Figure S6.** Polymerization of SCNC-ANI by adding DBSA to fabricate the DSP nanocomposites.



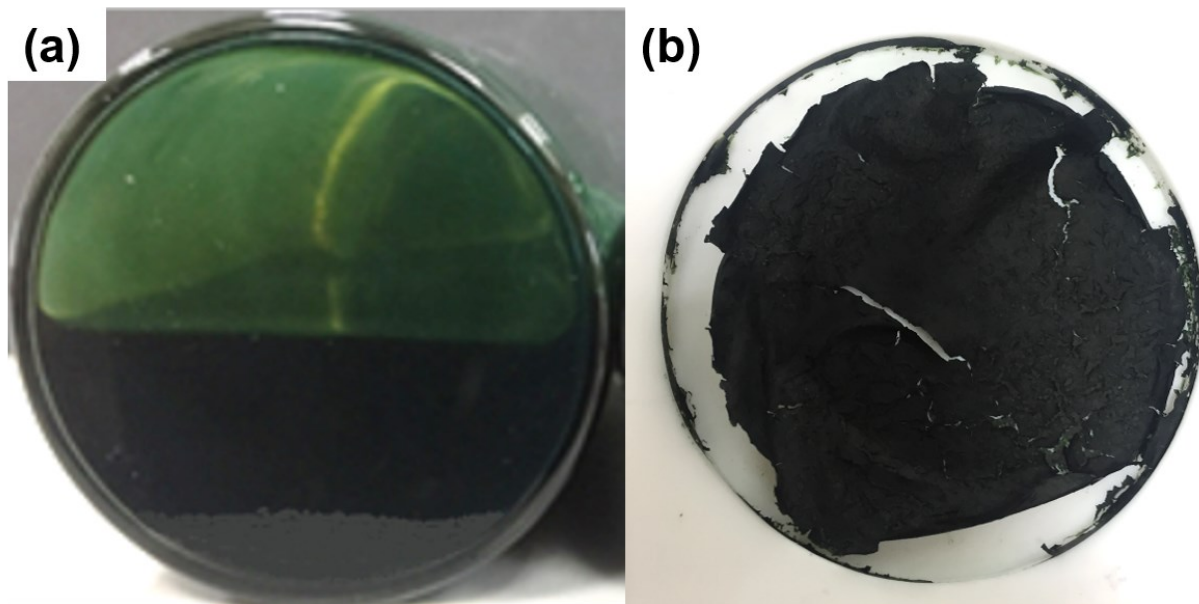

**Figure S7.** Photographs of CNC/ANI after adding DBSA through emulsion polymerization shows (a) insolubility issues and (b) broken film with large particle aggregation.
